# Supplementary material
Source: PubMed Central journal article supplement (PMC4393459)
Supplement: AEM.03865-14_zam999116232so1.pdf [file AEM.03865-14_zam999116232so1.pdf]

1 **Supplementary information**

2 **Table S1.** Distribution of the *bla<sub>ROB-1</sub>* gene and *bla<sub>ROB-1</sub>* encoding plasmid in *H.*

3 *parausis* clinical strains isolated from Glässer's disease lesions.

| <i>H. parausis</i><br>clinical isolate | Lesion       | <i>rob-1</i><br>presence | <i>rob-1</i> containing<br>plasmid size (Kb) | Country of isolation |
|----------------------------------------|--------------|--------------------------|----------------------------------------------|----------------------|
| ER-6P                                  | Pericarditis | -                        | -                                            | Spain                |
| 9904108                                | Unknown      | -                        | -                                            | Denmark              |
| 2725                                   | Arthritis    | -                        | -                                            | Germany              |
| PC4-6P                                 | Peritonitis  | -                        | -                                            | Spain                |
| PV1-12                                 | Pleuritis    | -                        | -                                            | Spain                |
| 228/04                                 | Pneumonia    | -                        | -                                            | Spain                |
| 373/03A                                | Pericarditis | -                        | -                                            | Spain                |
| IT29205                                | Unknown      | -                        | -                                            | Italy                |
| P015/96                                | Pneumonia    | -                        | -                                            | Argentina            |
| 264/99                                 | Arthritis    | -                        | -                                            | Spain                |
| Nagasaki                               | Meningitis   | -                        | -                                            | Japan                |
| 61/03                                  | Pneumonia    | -                        | -                                            | Spain                |
| Ba9/09-6                               | Arthritis    | -                        | -                                            | Spain                |
| 112/02                                 | Pericarditis | -                        | -                                            | Spain                |
| 167/03                                 | Pneumonia    | -                        | -                                            | Spain                |
| P555/04                                | Pericarditis | -                        | -                                            | Argentina            |
| PO114                                  | Pericarditis | -                        | -                                            | Poland               |
| 2620                                   | Pleuritis    | -                        | -                                            | Germany              |
| CT175-L                                | Pneumonia    | -                        | -                                            | Spain                |
| PG1-2M                                 | Meningitis   | -                        | -                                            | Portugal             |
| PG1-3M                                 | Meningitis   | -                        | -                                            | Portugal             |
| 7204122                                | Arthritis    | -                        | -                                            | Denmark              |
| 7204226                                | Unknown      | -                        | -                                            | Denmark              |
| 9904574                                | Unknown      | -                        | -                                            | Denmark              |

4

5 **Table S2.** Minimal inhibitory concentration (MIC) of 14 antimicrobials against 16 *H. parasuis* isolates.

6

| Strain                     | MIC (µg/ml) <sup>a</sup> |       |        |     |       |       |     |      |     |     |     |     |      |     |
|----------------------------|--------------------------|-------|--------|-----|-------|-------|-----|------|-----|-----|-----|-----|------|-----|
|                            | SMX                      | GEN   | CIP    | AMP | CTX   | CAZ   | TET | STR  | TMP | CHL | CST | FFN | KAN  | NAL |
| A3.1                       | 1024                     | 1     | 0.12   | >32 | 0.12  | ≤0.25 | ≤1  | 32   | 8   | ≤2  | ≤2  | ≤2  | ≤4   | ≤4  |
| D4.1                       | 256                      | 2     | ≤0.008 | >32 | ≤0.06 | ≤0.25 | ≤1  | 8    | 8   | ≤2  | ≤2  | ≤2  | ≤4   | ≤4  |
| D4.3                       | ≤8                       | 2     | 0.12   | 16  | ≤0.06 | ≤0.25 | ≤1  | 16   | 4   | ≤2  | ≤2  | ≤2  | ≤4   | 32  |
| F4.1                       | 512                      | 16    | 0.03   | >32 | ≤0.06 | ≤0.25 | ≤1  | 16   | >32 | ≤2  | ≤2  | ≤2  | ≤4   | 32  |
| F9                         | 64                       | 4     | 0.12   | >32 | ≤0.06 | ≤0.25 | 16  | >128 | >32 | ≤2  | ≤2  | ≤2  | >128 | 8   |
| MU21-2                     | 256                      | 2     | 1      | 32  | ≤0.06 | 2     | ≤1  | 16   | 16  | ≤2  | 4   | ≤2  | ≤4   | ≤4  |
| V56-2                      | 256                      | 4     | 0.015  | 32  | ≤0.06 | 0.5   | ≤1  | 16   | 16  | ≤2  | 4   | ≤2  | ≤4   | ≤4  |
| SC14-1                     | 1024                     | 2     | 0.03   | >32 | ≤0.06 | ≤0.25 | 16  | 64   | 4   | ≤2  | ≤2  | ≤2  | >128 | 32  |
| 416-1                      | 32                       | 0.5   | ≤0.008 | >32 | ≤0.06 | ≤0.25 | ≤1  | 1    | 4   | ≤2  | ≤2  | ≤2  | ≤4   | ≤4  |
| MU25-5                     | 256                      | 32    | 0.015  | 32  | ≤0.06 | ≤0.25 | ≤1  | 8    | 16  | ≤2  | ≤2  | ≤2  | ≤4   | ≤4  |
| NU5-3                      | 512                      | 2     | 0.25   | >32 | ≤0.06 | ≤0.25 | ≤1  | 8    | 8   | ≤2  | ≤2  | ≤2  | ≤4   | 64  |
| CD7-3                      | 512                      | 4     | 0.12   | >32 | ≤0.06 | 1     | ≤1  | 16   | >32 | ≤2  | ≤2  | ≤2  | 8    | 32  |
| CD9-1                      | 1024                     | 4     | 0.12   | >32 | ≤0.06 | ≤0.25 | ≤1  | 16   | >32 | ≤2  | ≤2  | ≤2  | 8    | 32  |
| PM5-4                      | 128                      | 2     | 0.06   | >32 | ≤0.06 | ≤0.25 | 8   | >128 | >32 | ≤2  | ≤2  | ≤2  | ≤4   | 32  |
| BB1033 (Amp <sup>S</sup> ) | 1024                     | ≤0.25 | 0.25   | 1   | 0.25  | 2     | 2   | 64   | 32  | ≤2  | ≤2  | ≤2  | 8    | 32  |
| BB1023 (Amp <sup>R</sup> ) | ≤8                       | 8     | ≤0.008 | >32 | ≤0.06 | ≤0.25 | 32  | 32   | >32 | ≤2  | ≤2  | ≤2  | 16   | 8   |

7 <sup>a</sup>SMX, sulfamethoxazole; GEN, gentamicin; CIP, ciprofloxacin; AMP, ampicillin; CTX, cefotaxime; CAZ, ceftazidime; TET, tetracycline, STR,

8 streptomycin; TMP, trimethoprim; CHL, chloramphenicol; CST, colistin; FFN, florfenicol; KAN, kanamycin; NAL, nalidixic Acid
